# Supplementary material for: Plant gum identification in historic artworks
Source: PubMed Central journal article supplement (PMC5397872; doi:10.1038/srep44538), 2017-04-20
Supplement: srep44538-s1.pdf [file srep44538-s1.pdf]

## **Plant gum identification in historic artworks**

Clara Granzotto<sup>1,2,4</sup>, Julie Arslanoglu<sup>3</sup>, Christian Rolando<sup>1</sup>, Caroline Tokarski<sup>1,\*</sup>

<sup>1</sup> Miniaturisation pour l'Analyse, la Synthèse & la Protéomique (MSAP), USR CNRS 3290, Université de Lille 1 Sciences et Technologies, 59655 Villeneuve d'Ascq, France.

<sup>2</sup> Department of Molecular Sciences and Nanosystems, Ca' Foscari University, Venice, Italy.

<sup>3</sup> Department of Scientific Research, The Metropolitan Museum of Art, New York, NY, USA.

<sup>4</sup> Present address: Department of Scientific Research, The Metropolitan Museum of Art, New York, NY, USA.

\* Correspondence has to be addressed to [Caroline.Tokarski@univ-lille1.fr](mailto:Caroline.Tokarski@univ-lille1.fr)

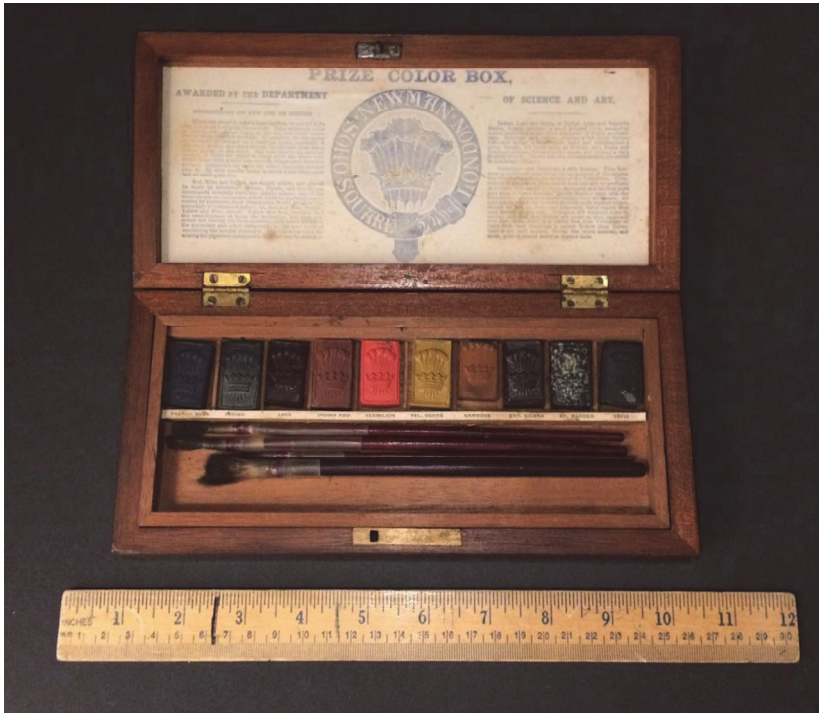

**Supplementary Figure 1.** Wooden 'Colour Box Charles Roberson & Co' dating 1870s. The box includes watercolor pans and a set of three brushes, manually prepared, with a wooden stick and a feather quill to attach the bristles to the stick. Approximately 1 mg was sampled from the blue watercolor paint located on the left in the box (noted "French Blue").

AS std

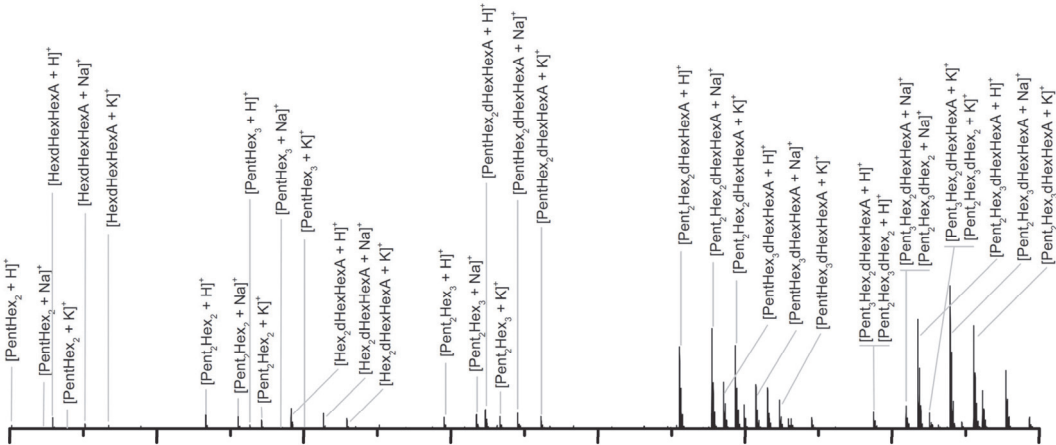

AS1

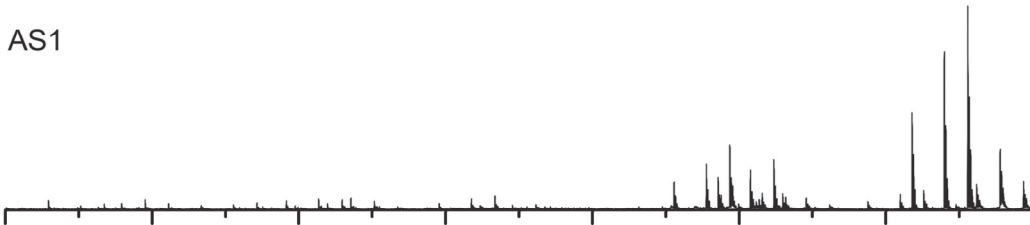

AS2

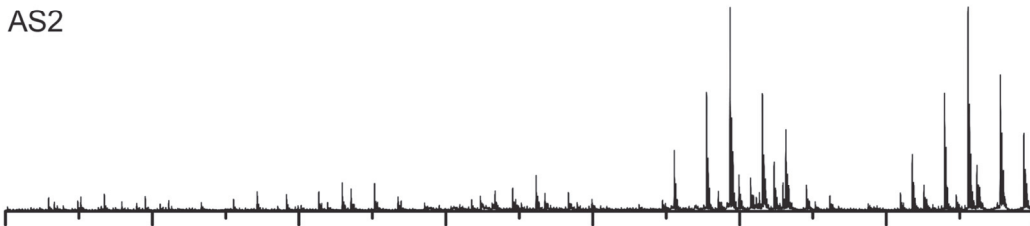

AS3

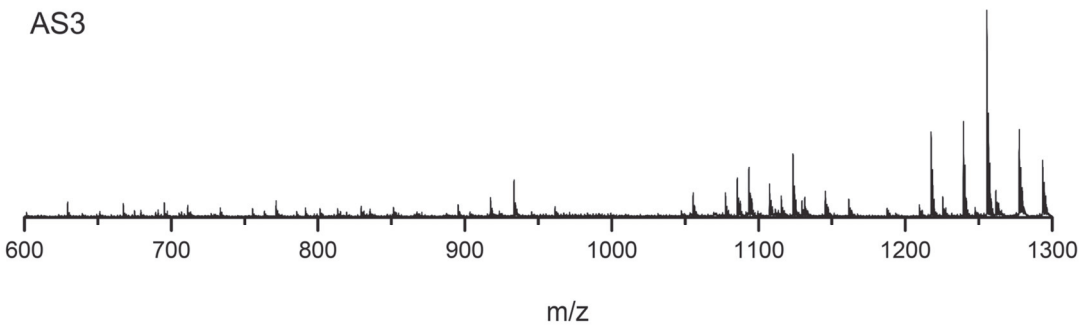

**Supplementary Figure 2.** MALDI-TOF MS spectra of digested *Acacia senegal* var. *senegal* samples (AS1, AS2 and AS3) compared to the standard gum arabic (AS std). *Acacia senegal* var. *senegal* AS1, AS2 and AS3 were respectively collected in Kordufan (Western Sudan) in 1994, Damazene (Southeast Sudan) in 1999 and Damazene (Southeast Sudan) in 1994. The y axis of spectra is the relative intensity.

AS std

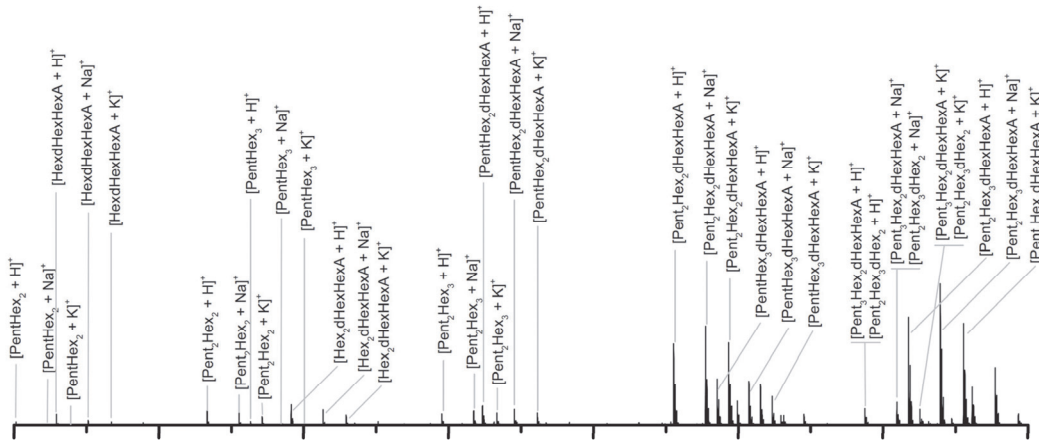

50-years-old

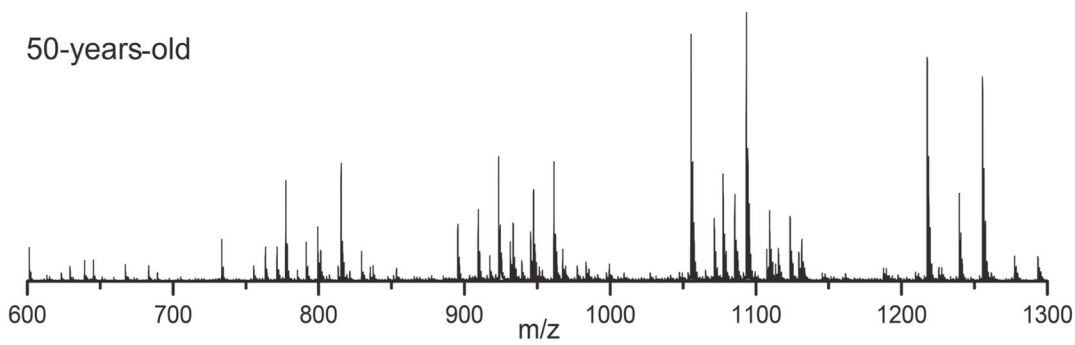

**Supplementary Figure 3.** MALDI-TOF MS spectra of digested 50-year-old gum arabic (The Metropolitan Museum of Art; supplier: Winsor and Newton) compared to the standard gum arabic (AS std). The y axis of the spectra is relative intensity.

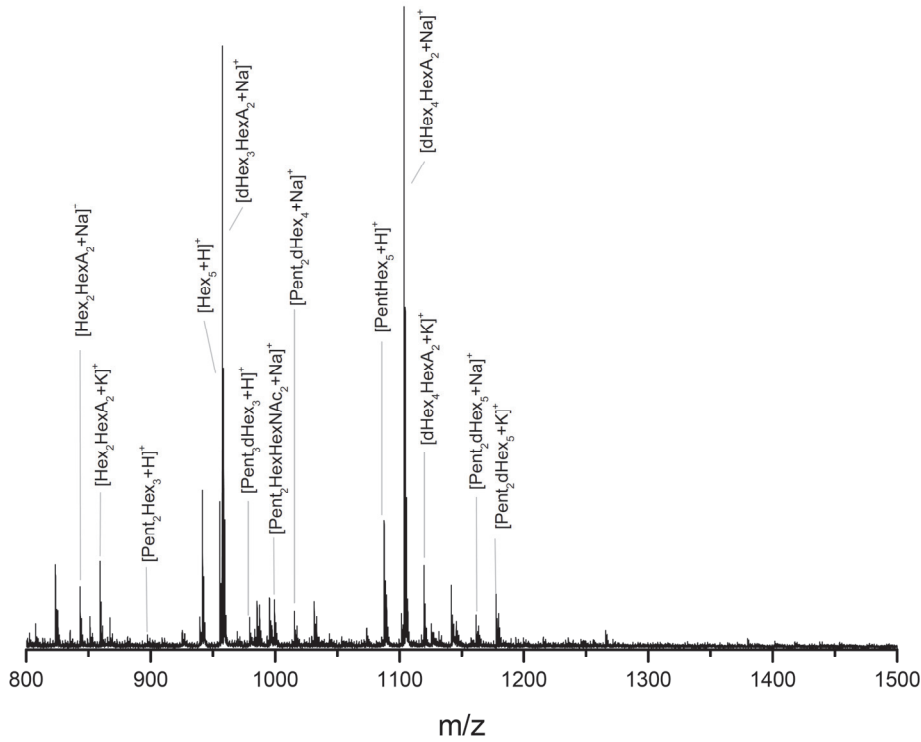

**Supplementary Figure 4.** MALDI-TOF MS spectrum of the enzymatically digested gum tragacanth. The monosaccharide order for each oligosaccharide is arbitrary and does not refer to its structure. The y axis of spectra is the relative intensity.

AS std

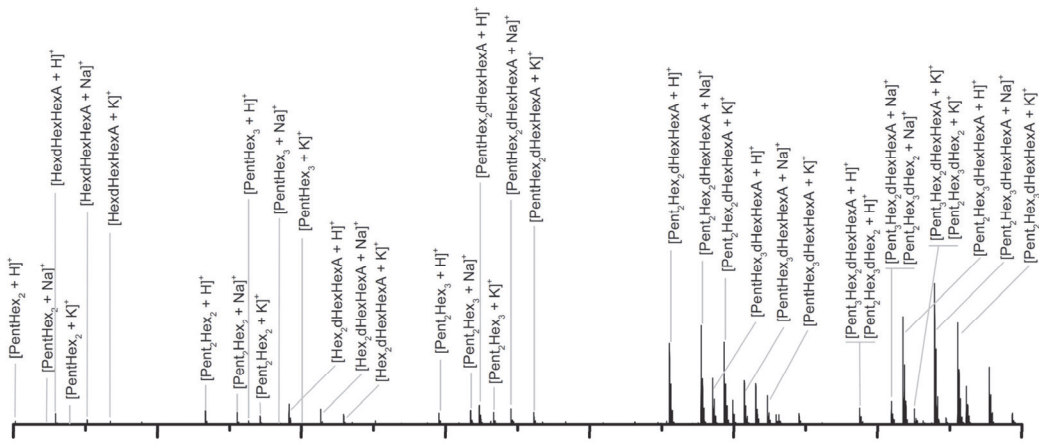

(a) n. 588

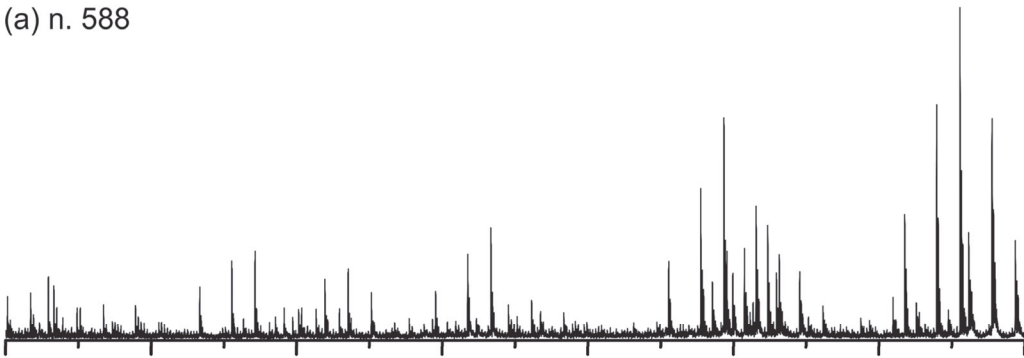

(b) n. 278

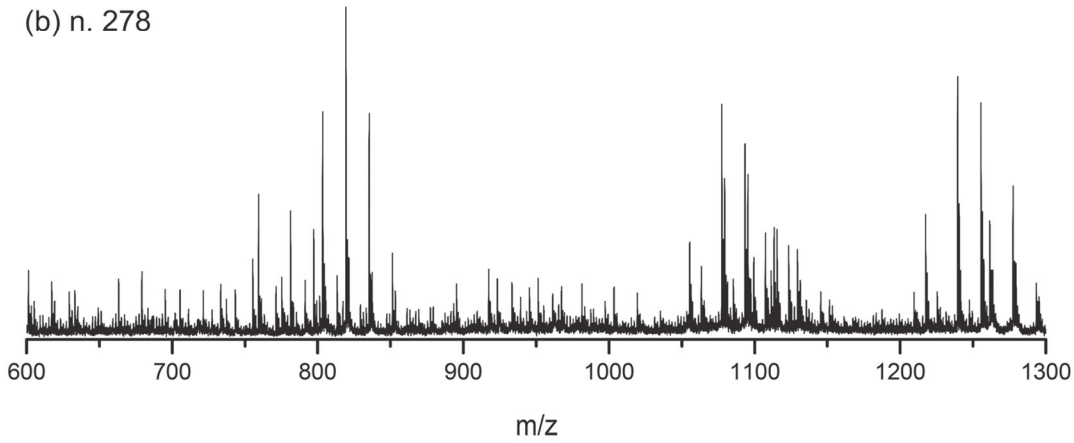

**Supplementary Figure 5.** MALDI-TOF MS spectra of contemporary watercolors sample n. 278 Burnt Sienna (Maimeri) and n. 588 Vermilion (Daler-Rowney) compared to the standard gum arabic (AS std). The y axis of spectra is the relative intensity.

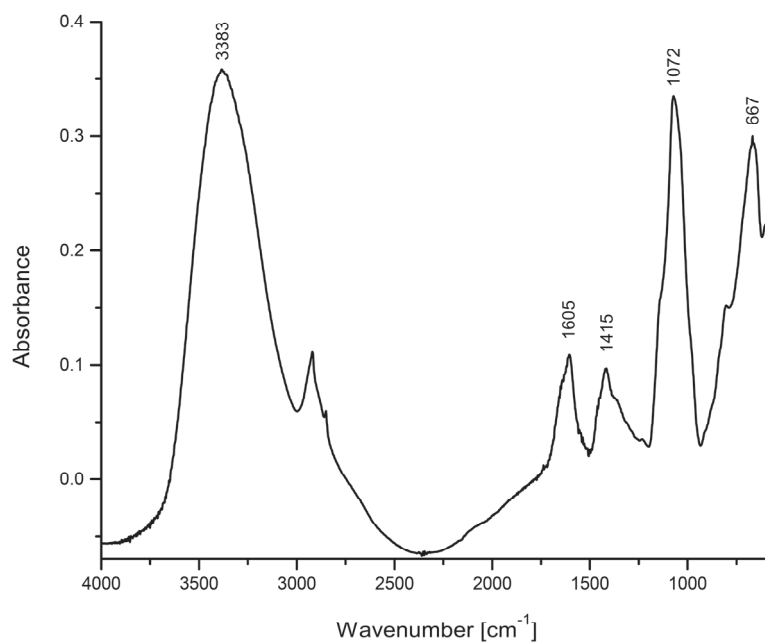

**Supplementary Figure 6.** FTIR spectrum of the French Blue paint from 'Colour Box Charles Roberson & Co' dating 1870s. The bands can be attributed to a polysaccharide based material: 3383 (from the OH stretching vibration), 1605, 1415, 1072 and 667 cm<sup>-1</sup>.

**Supplementary Table 1.** List of monosaccharides, their respective abbreviation, structure, formula and monoisotopic mass.

| Monosaccharide<br>(abbreviation)                      | Structure (abbreviation)                                                           | Formula                                          | Monoisotopic mass [Da] |                                        |
|-------------------------------------------------------|------------------------------------------------------------------------------------|--------------------------------------------------|------------------------|----------------------------------------|
|                                                       |                                                                                    |                                                  | Intact                 | Residue<br>(intact - H <sub>2</sub> O) |
| Pentose (Pent)                                        | Arabinose (Ara)<br>(Arabinofuranose, <i>Araf</i><br>Arabinopyranose, <i>Arap</i> ) | C <sub>5</sub> H <sub>10</sub> O <sub>5</sub>    | 150.05                 | 132.04                                 |
| Hexose (Hex)                                          | Galactose (Gal)<br>Mannose (Man)<br>Glucose (Glu)                                  | C <sub>6</sub> H <sub>12</sub> O <sub>6</sub>    | 180.06                 | 162.05                                 |
| Deoxyhexose (dHex)                                    | Rhamnose (Rha)<br>Fucose (Fuc)                                                     | C <sub>6</sub> H <sub>12</sub> O <sub>5</sub>    | 164.07                 | 146.06                                 |
| Hexuronic acid (HexA)<br>(Uronic acid, UA)            | Glucuronic acid (GlcA)<br>Galacturonic acid (GalA)                                 | C <sub>6</sub> H <sub>10</sub> O <sub>7</sub>    | 194.04                 | 176.03                                 |
| N-Acetylamine hexose<br>(HexNAc)                      | N-acetylgalactosamine<br>(GalNAc)                                                  | C <sub>8</sub> H <sub>15</sub> NO <sub>6</sub>   | 221.09                 | 203.08                                 |
| N-Acetylneuraminic acid<br>(NeuAc) / Sialic acid (SA) |                                                                                    | C <sub>11</sub> H <sub>19</sub> NO <sub>9</sub>  | 309.11                 | 291.09                                 |
| N-Glycolyl neuraminic acid<br>(NeuGc)                 |                                                                                    | C <sub>11</sub> H <sub>19</sub> NO <sub>10</sub> | 325.10                 | 307.09                                 |



**Supplementary Table 2.** List of the assigned oligosaccharides of the digested gum arabic corresponding to the **Fig. 1A** (i.e. gum arabic mass fingerprint).

| Experimental mass [Da] | $\Delta m$ [ppm] | Possible oligosaccharide*                                                     |
|------------------------|------------------|-------------------------------------------------------------------------------|
| 601.219                | - 2              | PentHex <sub>2</sub> [3-AQ/M+H] <sup>+</sup>                                  |
| 623.208                | - 4              | PentHex <sub>2</sub> [3-AQ/M+Na] <sup>+</sup>                                 |
| 629.217                | - 4              | HexdHexHexA [3-AQ/M+H] <sup>+</sup>                                           |
| 639.177                | - 5              | PentHex <sub>2</sub> [3-AQ/M+K] <sup>+</sup>                                  |
| 651.196                | - 6              | HexdHexHexA [3-AQ/M+Na] <sup>+</sup>                                          |
| 667.175                | - 7              | HexdHexHexA [3-AQ/M+K] <sup>+</sup>                                           |
| 733.272                | 2                | Pent <sub>2</sub> Hex <sub>2</sub> [3-AQ/M+H] <sup>+</sup>                    |
| 755.250                | 0                | Pent <sub>2</sub> Hex <sub>2</sub> [3-AQ/M+Na] <sup>+</sup>                   |
| 763.280                | 0                | PentHex <sub>3</sub> [3-AQ/M+H] <sup>+</sup>                                  |
| 771.229                | 12               | Pent <sub>2</sub> Hex <sub>2</sub> [3-AQ/M+K] <sup>+</sup>                    |
| 785.258                | - 2              | PentHex <sub>3</sub> [3-AQ/M+Na] <sup>+</sup>                                 |
| 791.278                | 10               | Hex <sub>2</sub> dHexHexA [3-AQ/M+H] <sup>+</sup>                             |
| 801.227                | - 3              | PentHex <sub>3</sub> [3-AQ/M+K] <sup>+</sup>                                  |
| 813.247                | - 4              | Hex <sub>2</sub> dHexHexA [3-AQ/M+Na] <sup>+</sup>                            |
| 829.226                | - 5              | Hex <sub>2</sub> dHexHexA [3-AQ/M+K] <sup>+</sup>                             |
| 895.311                | - 10             | Pent <sub>2</sub> Hex <sub>3</sub> [3-AQ/M+H] <sup>+</sup>                    |
| 917.300                | 0                | Pent <sub>2</sub> Hex <sub>3</sub> [3-AQ/M+Na] <sup>+</sup>                   |
| 923.309                | - 1              | PentHex <sub>2</sub> dHexHexA [3-AQ/M+H] <sup>+</sup>                         |
| 933.279                | - 1              | Pent <sub>2</sub> Hex <sub>3</sub> [3-AQ/M+K] <sup>+</sup>                    |
| 945.298                | - 2              | PentHex <sub>2</sub> dHexHexA [3-AQ/M+Na] <sup>+</sup>                        |
| 961.267                | - 3              | PentHex <sub>2</sub> dHexHexA [3-AQ/M+K] <sup>+</sup>                         |
| 1055.360               | 0                | Pent <sub>2</sub> Hex <sub>2</sub> dHexHexA [3-AQ/M+H] <sup>+</sup>           |
| 1077.338               | - 2              | Pent <sub>2</sub> Hex <sub>2</sub> dHexHexA [3-AQ/M+Na] <sup>+</sup>          |
| 1085.378               | 7                | PentHex <sub>3</sub> dHexHexA [3-AQ/M+H] <sup>+</sup>                         |
| 1093.317               | 6                | Pent <sub>2</sub> Hex <sub>2</sub> dHexHexA [3-AQ/M+K] <sup>+</sup>           |
| 1107.346               | - 4              | PentHex <sub>3</sub> dHexHexA [3-AQ/M+Na] <sup>+</sup>                        |
| 1123.325               | 4                | PentHex <sub>3</sub> dHexHexA [3-AQ/M+K] <sup>+</sup>                         |
| 1187.409               | 8                | Pent <sub>3</sub> Hex <sub>2</sub> dHexHexA [3-AQ/M+H] <sup>+</sup>           |
| 1187.409               | - 17             | Pent <sub>2</sub> Hex <sub>3</sub> dHex <sub>2</sub> [3-AQ/M+H] <sup>+</sup>  |
| 1209.398               | 14               | Pent <sub>3</sub> Hex <sub>2</sub> dHexHexA [3-AQ/M+Na] <sup>+</sup>          |
| 1209.398               | - 19             | Pent <sub>2</sub> Hex <sub>3</sub> dHex <sub>2</sub> [3-AQ/M+Na] <sup>+</sup> |
| 1217.41                | - 3              | Pent <sub>2</sub> Hex <sub>3</sub> dHexHexA [3-AQ/M+H] <sup>+</sup>           |
| 1225.366               | 13               | Pent <sub>3</sub> Hex <sub>2</sub> dHexHexA [3-AQ/M+K] <sup>+</sup>           |
| 1225.366               | - 19             | Pent <sub>2</sub> Hex <sub>3</sub> dHex <sub>2</sub> [3-AQ/M+K] <sup>+</sup>  |
| 1239.385               | - 4              | Pent <sub>2</sub> Hex <sub>3</sub> dHexHexA [3-AQ/M+Na] <sup>+</sup>          |
| 1255.364               | - 5              | Pent <sub>2</sub> Hex <sub>3</sub> dHexHexA [3-AQ/M+K] <sup>+</sup>           |

\* Oligosaccharides are derivatized with 3-aminoquinoline (3-AQ) and ionized with H<sup>+</sup>, Na<sup>+</sup> or K<sup>+</sup>. The order of monosaccharides for each oligosaccharide is arbitrary and does not refer to its structure.

**Supplementary Table 3.** List of the main oligosaccharides of the digested cherry gum corresponding to the **Fig. 1C** (i.e. cherry gum mass fingerprint).

| Experimental mass [Da] | $\Delta m$ [ppm] | Possible oligosaccharide*                                    |
|------------------------|------------------|--------------------------------------------------------------|
| 771.218                | - 2              | Pent <sub>2</sub> Hex <sub>2</sub> [3-AQ/M + K] <sup>+</sup> |
| 835.304                | 5                | Pent <sub>2</sub> Hex <sub>3</sub> [3-AQ/M + K] <sup>+</sup> |
| 933.298                | 19               | Pent <sub>4</sub> Hex [3-AQ/M + H] <sup>+</sup>              |
| 1095.336               | 5                | Pent <sub>2</sub> Hex <sub>4</sub> [3-AQ/M + K] <sup>+</sup> |
| 1227.365               | - 4              | Pent <sub>3</sub> Hex <sub>4</sub> [3-AQ/M + K] <sup>+</sup> |
| 1359.413               | - 5              | Pent <sub>4</sub> Hex <sub>4</sub> [3-AQ/M + K] <sup>+</sup> |
| 1491.441               | - 6              | Pent <sub>5</sub> Hex <sub>4</sub> [3-AQ/M + K] <sup>+</sup> |
| 1623.497               | - 2              | Pent <sub>6</sub> Hex <sub>4</sub> [3-AQ/M + K] <sup>+</sup> |
| 1755.533               | - 4              | Pent <sub>7</sub> Hex <sub>4</sub> [3-AQ/M + K] <sup>+</sup> |
| 1887.568               | - 7              | Pent <sub>8</sub> Hex <sub>4</sub> [3-AQ/M + K] <sup>+</sup> |
| 2019.612               | - 4              | Pent <sub>9</sub> Hex <sub>4</sub> [3-AQ/M + K] <sup>+</sup> |

\* Oligosaccharides are derivatized with 3-aminoquinoline (3-AQ) and ionized with H<sup>+</sup> or K<sup>+</sup>. The order of monosaccharides for each oligosaccharide is arbitrary and does not refer to its structure.

**Supplementary Table 4.** List of the main oligosaccharides of the digested LBG corresponding to the **Fig. 1B** (i.e. LBG mass fingerprint).

| Experimental mass [Da] | $\Delta m$ [ppm] | Possible oligosaccharide*                    |
|------------------------|------------------|----------------------------------------------|
| 631.227                | - 4              | Hex <sub>3</sub> [3-AQ/M + H] <sup>+</sup>   |
| 653.216                | - 6              | Hex <sub>3</sub> [3-AQ/M + Na] <sup>+</sup>  |
| 669.185                | - 7              | Hex <sub>3</sub> [3-AQ/M + K] <sup>+</sup>   |
| 705.183                | 5                | Hex <sub>4</sub> [M + K] <sup>+</sup>        |
| 793.278                | - 2              | Hex <sub>4</sub> [3-AQ/M + H] <sup>+</sup>   |
| 815.267                | - 4              | Hex <sub>4</sub> [3-AQ/M + Na] <sup>+</sup>  |
| 831.336                | - 5              | Hex <sub>4</sub> [3-AQ/M + K] <sup>+</sup>   |
| 867.233                | - 8              | Hex <sub>5</sub> [M + K] <sup>+</sup>        |
| 955.337                | - 3              | Hex <sub>5</sub> [3-AQ/M + H] <sup>+</sup>   |
| 977.316                | - 4              | Hex <sub>5</sub> [3-AQ/M + Na] <sup>+</sup>  |
| 993.295                | - 5              | Hex <sub>5</sub> [3-AQ/M + K] <sup>+</sup>   |
| 1029.292               | 2                | Hex <sub>6</sub> [M + K] <sup>+</sup>        |
| 1117.395               | 5                | Hex <sub>6</sub> [3-AQ/M + H] <sup>+</sup>   |
| 1139.374               | 3                | Hex <sub>6</sub> [3-AQ/M + Na] <sup>+</sup>  |
| 1155.352               | 2                | Hex <sub>6</sub> [3-AQ/M + K] <sup>+</sup>   |
| 1191.349               | 8                | Hex <sub>7</sub> [M + K] <sup>+</sup>        |
| 1279.442               | 2                | Hex <sub>7</sub> [3-AQ/M + H] <sup>+</sup>   |
| 1301.430               | 0                | Hex <sub>7</sub> [3-AQ/M + Na] <sup>+</sup>  |
| 1317.399               | - 1              | Hex <sub>7</sub> [3-AQ/M + K] <sup>+</sup>   |
| 1353.405               | 4                | Hex <sub>8</sub> [M + K] <sup>+</sup>        |
| 1441.497               | - 2              | Hex <sub>8</sub> [3-AQ/M + H] <sup>+</sup>   |
| 1463.475               | - 3              | Hex <sub>8</sub> [3-AQ/M + Na] <sup>+</sup>  |
| 1479.453               | 2                | Hex <sub>8</sub> [3-AQ/M + K] <sup>+</sup>   |
| 1441.507               | 5                | Hex <sub>9</sub> [M + K] <sup>+</sup>        |
| 1603.541               | - 6              | Hex <sub>9</sub> [3-AQ/M + H] <sup>+</sup>   |
| 1625.529               | - 1              | Hex <sub>9</sub> [3-AQ/M + Na] <sup>+</sup>  |
| 1641.517               | 4                | Hex <sub>9</sub> [3-AQ/M + K] <sup>+</sup>   |
| 1677.493               | - 4              | Hex <sub>10</sub> [M + K] <sup>+</sup>       |
| 1765.593               | - 4              | Hex <sub>10</sub> [3-AQ/M + H] <sup>+</sup>  |
| 1787.591               | 0                | Hex <sub>10</sub> [3-AQ/M + Na] <sup>+</sup> |
| 1803.569               | 5                | Hex <sub>10</sub> [3-AQ/M + K] <sup>+</sup>  |
| 1839.555               | 3                | Hex <sub>11</sub> [M + K] <sup>+</sup>       |
| 1965.609               | 0                | Hex <sub>11</sub> [3-AQ/M + K] <sup>+</sup>  |
| 2001.615               | 2                | Hex <sub>12</sub> [M + K] <sup>+</sup>       |
| 2127.689               | 13               | Hex <sub>12</sub> [3-AQ/M + K] <sup>+</sup>  |
| 2289.726               | 3                | Hex <sub>13</sub> [3-AQ/M + K] <sup>+</sup>  |
| 2451.763               | - 3              | Hex <sub>14</sub> [3-AQ/M + K] <sup>+</sup>  |

\* Oligosaccharides are derivatized with 3-aminoquinoline (3-AQ) and ionized with H<sup>+</sup>, Na<sup>+</sup> or K<sup>+</sup>.

**Supplementary Table 5.** List of the assigned oligosaccharides for digested gum tragacanth corresponding to the **Supplementary Fig.-4** (i.e. gum tragacanth mass fingerprint).

| Experimental mass [Da] | $\Delta m$ [ppm] | Possible oligosaccharide*                                        |
|------------------------|------------------|------------------------------------------------------------------|
| 843.225                | - 3              | Hex <sub>2</sub> HexA <sub>2</sub> [3AQ/M+Na] <sup>+</sup>       |
| 859.204                | 3                | Hex <sub>2</sub> HexA <sub>2</sub> [3AQ/M+K] <sup>+</sup>        |
| 895.318                | - 1              | Pent <sub>2</sub> Hex <sub>3</sub> [3AQ/M+H] <sup>+</sup>        |
| 955.342                | 2                | Hex <sub>5</sub> [3AQ/M+H] <sup>+</sup>                          |
| 957.296                | 1                | dHex <sub>3</sub> HexA <sub>2</sub> [3AQ/M+Na] <sup>+</sup>      |
| 979.374                | - 2              | Pent <sub>3</sub> dHex <sub>3</sub> [3AQ/M+H] <sup>+</sup>       |
| 999.332                | - 2              | Pent <sub>2</sub> HexHexNAc <sub>2</sub> [3AQ/M+Na] <sup>+</sup> |
| 1015.376               | 2                | Pent <sub>2</sub> dHex <sub>4</sub> [3AQ/M+Na] <sup>+</sup>      |
| 1087.384               | 2                | PentHex <sub>5</sub> [3AQ/M+H] <sup>+</sup>                      |
| 1103.357               | 4                | dHex <sub>4</sub> HexA <sub>2</sub> [3AQ/M+Na] <sup>+</sup>      |
| 1119.329               | 2                | dHex <sub>4</sub> HexA <sub>2</sub> [3AQ/M+K] <sup>+</sup>       |
| 1161.431               | - 1              | Pent <sub>2</sub> dHex <sub>5</sub> [3AQ/M+Na] <sup>+</sup>      |
| 1177.405               | - 1              | Pent <sub>2</sub> dHex <sub>5</sub> [3AQ/M+K] <sup>+</sup>       |

\* Oligosaccharides are derivatized with 3-aminoquinoline (3-AQ) and ionized with H<sup>+</sup>, Na<sup>+</sup> or K<sup>+</sup>.

**Supplementary Table 6.** List of the fragment ions resulting from the MS/MS experiment of the [3-AQ/M + H]<sup>+</sup> ions at *m/z* 1055.360 and 1187.409 from the digested arabic gum (corresponding to spectra in **Fig. 2A** and **Fig. 2B** respectively).

| Experimental mass [Da]            | $\Delta m$ [ppm] | Experimental mass [Da]            | $\Delta m$ [ppm] | Fragment ions*                                                                         |
|-----------------------------------|------------------|-----------------------------------|------------------|----------------------------------------------------------------------------------------|
| Precursor ion <i>m/z</i> 1055.360 |                  | Precursor ion <i>m/z</i> 1187.409 |                  |                                                                                        |
| 145.09                            | 68               | 145.09                            | 68               | Y <sub>0</sub> (3-AQ) [M+H] <sup>***</sup>                                             |
| 277.11                            | 36               | 277.10                            | 72               | Y <sub>1</sub> (Pent) [3-AQ/M+H] <sup>+</sup>                                          |
| 307.14                            | 32               | 307.13                            | -                | Y <sub>1</sub> ' (Hex) [3-AQ/M+H] <sup>+</sup>                                         |
| 439.19                            | 45               | 439.15                            | 45               | Y <sub>2</sub> (PentHex) [3-AQ/M+H] <sup>+</sup>                                       |
| 469.20                            | 42               | 469.21                            | 63               | Y <sub>2</sub> ' (Hex <sub>2</sub> ) [3-AQ/M+H] <sup>+</sup>                           |
| 601.24                            | 33               | 601.22                            | -                | Y <sub>3</sub> (PentHex <sub>2</sub> ) [3-AQ/M+H] <sup>+</sup>                         |
| 645.24                            | 46               | 645.24                            | 46               | Y <sub>3</sub> ' (Hex <sub>2</sub> HexA) [3-AQ/M+H] <sup>+</sup>                       |
| 733.28                            | 13               | 733.30                            | 40               | Y <sub>4</sub> (Pent <sub>2</sub> Hex <sub>2</sub> ) [3-AQ/M+H] <sup>+</sup>           |
| -                                 | -                | 763.31                            | 39               | Y <sub>4</sub> ''' (PentHex <sub>3</sub> ) [3-AQ/M+H] <sup>+</sup>                     |
| 777.28                            | 39               | -                                 | -                | Y <sub>4</sub> ' (PentHex <sub>2</sub> HexA) [3-AQ/M+H] <sup>+</sup>                   |
| 791.28                            | 12               | 791.30                            | 38               | Y <sub>4</sub> '' (Hex <sub>2</sub> HexAdHex) [3-AQ/M+H] <sup>+</sup>                  |
| -                                 | -                | 865.32                            | 12               | Y <sub>5</sub> '' (Pent <sub>3</sub> Hex <sub>2</sub> )                                |
| 909.31                            | 11               | 909.34                            | 44               | Y <sub>5</sub> (Pent <sub>2</sub> Hex <sub>2</sub> HexA) [3-AQ/M+H] <sup>+</sup>       |
| -                                 | -                | 909.34                            | 11               | Y <sub>5</sub> (PentHex <sub>3</sub> dHex) [3-AQ/M+H] <sup>+</sup>                     |
| 923.32                            | 11               | 923.32                            | 11               | Y <sub>5</sub> ' (PentHex <sub>2</sub> HexAdHex) [3-AQ/M+H] <sup>+</sup>               |
| -                                 | -                | 1041.37                           | 29               | Y <sub>6</sub> (Pent <sub>3</sub> Hex <sub>2</sub> HexA) [3-AQ/M+H] <sup>+</sup>       |
| -                                 | -                | 1041.37                           | 9                | Y <sub>6</sub> (Pent <sub>2</sub> Hex <sub>3</sub> dHex) [3-AQ/M+H] <sup>+</sup>       |
| -                                 | -                | 1055.40                           | 38               | Y <sub>6</sub> ' (Pent <sub>2</sub> Hex <sub>2</sub> HexAdHex) [3-AQ/M+H] <sup>+</sup> |
| 1055.360                          | 0                | -                                 | -                | Pent <sub>2</sub> Hex <sub>2</sub> dHexHexA [3-AQ/M+H] <sup>****</sup>                 |
| -                                 | -                | 1187.409                          | 8                | Pent <sub>3</sub> Hex <sub>2</sub> dHexHexA [3-AQ/M+H] <sup>****</sup>                 |
|                                   |                  |                                   | - 17             | Pent <sub>2</sub> Hex <sub>3</sub> dHex <sub>2</sub> [3-AQ/M+H] <sup>****</sup>        |

\* Fragment ions are derivatized with 3-aminoquinoline (3-AQ) and ionized with H<sup>+</sup>.

\*\* The ion at *m/z* 145.11 (Y<sub>0</sub>) corresponds to the protonated 3-aminoquinoline [M + H]<sup>+</sup>.

\*\*\* Precursors ions at *m/z* 1055.360 and *m/z* 1187.409

**Supplementary Table 7.** List of the main oligosaccharides of the digested watercolor sample dating from 1870, Colour Box Charles Roberson & Co (The Metropolitan Museum of Art), corresponding to the **Fig. 3** (i.e. gum arabic mass fingerprint identified in the historic watercolor).

| Experimental mass [Da]* | $\Delta m$ [ppm] | Possible oligosaccharide*                                                     |
|-------------------------|------------------|-------------------------------------------------------------------------------|
| 629.216                 | - 6              | HexdHexHexA [3-AQ/M+H] <sup>+</sup>                                           |
| 667.184                 | 6                | HexdHexHexA [3-AQ/M+K] <sup>+</sup>                                           |
| 733.260                 | - 13             | Pent <sub>2</sub> Hex <sub>2</sub> [3-AQ/M+H] <sup>+</sup>                    |
| 755.249                 | - 2              | Pent <sub>2</sub> Hex <sub>2</sub> [3-AQ/M+Na] <sup>+</sup>                   |
| 763.278                 | - 2              | PentHex <sub>3</sub> [3-AQ/M+H] <sup>+</sup>                                  |
| 771.218                 | - 3              | Pent <sub>2</sub> Hex <sub>2</sub> [3-AQ/M+K] <sup>+</sup>                    |
| 791.266                 | - 4              | Hex <sub>2</sub> dHexHexA [3-AQ/M+H] <sup>+</sup>                             |
| 801.226                 | - 5              | PentHex <sub>3</sub> [3-AQ/M+K] <sup>+</sup>                                  |
| 813.245                 | - 6              | Hex <sub>2</sub> dHexHexA [3-AQ/M+Na] <sup>+</sup>                            |
| 829.234                 | 5                | Hex <sub>2</sub> dHexHexA [3-AQ/M+K] <sup>+</sup>                             |
| 895.319                 | - 1              | Pent <sub>2</sub> Hex <sub>3</sub> [3-AQ/M+H] <sup>+</sup>                    |
| 917.298                 | - 2              | Pent <sub>2</sub> Hex <sub>3</sub> [3-AQ/M+Na] <sup>+</sup>                   |
| 923.307                 | - 3              | PentHex <sub>2</sub> dHexHexA [3-AQ/M+H] <sup>+</sup>                         |
| 933.287                 | 7                | Pent <sub>2</sub> Hex <sub>3</sub> [3-AQ/M+K] <sup>+</sup>                    |
| 945.296                 | - 5              | PentHex <sub>2</sub> dHexHexA [3-AQ/M+Na] <sup>+</sup>                        |
| 961.275                 | 5                | PentHex <sub>2</sub> dHexHexA [3-AQ/M+K] <sup>+</sup>                         |
| 1055.367                | 7                | Pent <sub>2</sub> Hex <sub>2</sub> dHexHexA [3-AQ/M+H] <sup>+</sup>           |
| 1077.335                | - 4              | Pent <sub>2</sub> Hex <sub>2</sub> dHexHexA [3-AQ/M+Na] <sup>+</sup>          |
| 1085.375                | 4                | PentHex <sub>3</sub> dHexHexA [3-AQ/M+H] <sup>+</sup>                         |
| 1093.304                | - 5              | Pent <sub>2</sub> Hex <sub>2</sub> dHexHexA [3-AQ/M+K] <sup>+</sup>           |
| 1107.353                | 3                | PentHex <sub>3</sub> dHexHexA [3-AQ/M+Na] <sup>+</sup>                        |
| 1123.322                | 1                | PentHex <sub>3</sub> dHexHexA [3-AQ/M+K] <sup>+</sup>                         |
| 1187.406                | 5                | Pent <sub>3</sub> Hex <sub>2</sub> dHexHexA [3-AQ/M+H] <sup>+</sup>           |
| 1187.406                | - 20             | Pent <sub>2</sub> Hex <sub>3</sub> dHex <sub>2</sub> [3-AQ/M+H] <sup>+</sup>  |
| 1209.394                | 12               | Pent <sub>3</sub> Hex <sub>2</sub> dHexHexA [3-AQ/M+Na] <sup>+</sup>          |
| 1209.394                | - 21             | Pent <sub>2</sub> Hex <sub>3</sub> dHex <sub>2</sub> [3-AQ/M+Na] <sup>+</sup> |
| 1217.413                | 3                | Pent <sub>2</sub> Hex <sub>3</sub> dHexHexA [3-AQ/M+H] <sup>+</sup>           |
| 1225.363                | 10               | Pent <sub>3</sub> Hex <sub>2</sub> dHexHexA [3-AQ/M+K] <sup>+</sup>           |
| 1225.363                | - 22             | Pent <sub>2</sub> Hex <sub>3</sub> dHex <sub>2</sub> [3-AQ/M+K] <sup>+</sup>  |
| 1239.381                | - 7              | Pent <sub>2</sub> Hex <sub>3</sub> dHexHexA [3-AQ/M+Na] <sup>+</sup>          |
| 1255.370                | 0                | Pent <sub>2</sub> Hex <sub>3</sub> dHexHexA [3-AQ/M+K] <sup>+</sup>           |

\* Oligosaccharides are derivatized with 3-aminoquinoline (3-AQ) and ionized with H<sup>+</sup>, Na<sup>+</sup> or K<sup>+</sup>. The order of monosaccharides for each oligosaccharide is arbitrary and does not refer to its structure.
